# Supplementary material for: Neuroinflammation and White Matter Alterations in Obesity Assessed by Diffusion Basis Spectrum Imaging
Source: Front Hum Neurosci. 2020 Jan 14;13:464. doi: 10.3389/fnhum.2019.00464 (PMC6971102; doi:10.3389/fnhum.2019.00464)
Supplement: Supplementary file 1 [file Table_1.xlsx]

## Sheet: DBSI Metric Overlap
Supplementary file 1: A list of white matter tracts and the percentage of overlap in DBSI fiber fraction (DBSI-FF) and DBSI restricted fraction (DBSI-RF) differences between obese and non-obese individuals in both cohorts. We ranked all tracts based on the number of overlap voxels in DBSI-RF in descending order.
Tract Name	Full Skeleton	DBSI-FF overlap		DBSI-RF overlap
	Number of voxels	Number of voxels	Percent	Number of voxels	Percent
Body of corpus callosum	3172	1444	0.455233	1663	0.524275
Splenium of corpus callosum	2376	1266	0.532828	1421	0.598064
Middle cerebellar peduncle	2656	935	0.352033	1348	0.50753
Superior longitudinal fasciculus R	1480	602	0.406757	766	0.517568
Posterior thalamic radiation R	1172	624	0.532423	686	0.585324
Anterior corona radiata R	1623	393	0.242144	564	0.347505
Posterior thalamic radiation L	1061	505	0.475966	563	0.530631
External capsule L	1452	653	0.449725	557	0.383609
Genu of corpus callosum	1818	752	0.413641	524	0.288229
External capsule R	1277	637	0.498825	520	0.407204
Retrolenticular part of internal capsule R	735	409	0.556463	504	0.685714
Cerebral peduncle R	627	307	0.489633	463	0.738437
Retrolenticular part of internal capsule L	717	354	0.493724	456	0.635983
Cerebral peduncle L	658	211	0.320669	429	0.651976
Superior longitudinal fasciculus L	1386	472	0.340548	415	0.299423
Anterior limb of internal capsule L	846	273	0.322695	390	0.460993
Sagittal stratum R	625	272	0.4352	389	0.6224
Anterior corona radiata L	1599	250	0.156348	363	0.227017
Posterior limb of internal capsule R	884	542	0.613122	339	0.383484
Anterior limb of internal capsule R	812	196	0.241379	309	0.380542
Superior corona radiata R	1333	444	0.333083	279	0.209302
Cingulum (hippocampus) R	353	206	0.583569	272	0.770538
Posterior limb of internal capsule L	874	349	0.399314	249	0.284897
Sagittal stratum L	486	197	0.40535	211	0.434156
Fornix (crus) L	357	144	0.403361	201	0.563025
Fornix (crus) R	294	158	0.537415	193	0.656463
Posterior corona radiata R	770	254	0.32987	193	0.250649
Cingulum (hippocampus) L	315	5	0.015873	192	0.609524
Cingulum (cingulate gyrus) R	326	200	0.613497	182	0.558282
Inferior cerebellar peduncle R	292	80	0.273973	181	0.619863
Superior cerebellar peduncle R	265	16	0.0603774	173	0.65283
Pontine crossing tract	341	21	0.0615836	166	0.486804
Corticospinal tract R	375	33	0.088	166	0.442667
Corticospinal tract L	420	53	0.12619	162	0.385714
Superior cerebellar peduncle L	232	3	0.012931	158	0.681034
Medial lemniscus L	228	66	0.289474	147	0.644737
Inferior cerebellar peduncle L	261	63	0.241379	144	0.551724
Superior corona radiata L	1280	214	0.167187	144	0.1125
Medial lemniscus R	234	80	0.34188	139	0.594017
Posterior corona radiata L	737	248	0.336499	120	0.162822
Cingulum (cingulate gyrus) L	397	85	0.214106	105	0.264484
Fornix (column and body of fornix)	196	1	0.00510204	102	0.520408
Superior fronto-occipital fasciculus L	106	39	0.367925	53	0.5
Uncinate fasciculus L	83	46	0.554217	45	0.542169
Uncinate fasciculus R	82	15	0.182927	22	0.268293
Superior fronto-occipital fasciculus R	86	50	0.581395	21	0.244186
Tapetum R	28	14	0.5	16	0.571429
Tapetum L	1	0	0	1	1
